# Supplementary material for: Machine learning-assisted design of AlN-based high-performance piezoelectric materials
Source: Royal Society of Chemistry journal article supplement (doi:10.1039/d3ta02095a), 2023-01-01
Supplement: d3ta02095a1.pdf [file d3ta02095a1.pdf]

## Supplementary Materials

### Machine learning-assisted design of AlN-based high-performance piezoelectric materials

Huirong Jing,<sup>a</sup> Chaohong Guan,<sup>a</sup> Yu Yang,<sup>a</sup> Hong Zhu<sup>a,\*</sup>

<sup>a</sup> University of Michigan– Shanghai Jiao Tong University Joint Institute, Shanghai Jiao Tong University, Shanghai 200240, China

\* Authors to whom correspondence should be addressed: hong.zhu@sjtu.edu.cn

## Feature construction and selection

Table S1. Original features in the features pool.

| Types               | Features abbreviation                                                      | Descriptions                                                                                                                                     |
|---------------------|----------------------------------------------------------------------------|--------------------------------------------------------------------------------------------------------------------------------------------------|
| Electronic features | <i>FED</i>                                                                 | Average formation energy of decomposition products (e.g. AlN, ScN, Be <sub>3</sub> N <sub>2</sub> ...)                                           |
|                     | <i>BGD</i>                                                                 | Average band gap of decomposition products                                                                                                       |
|                     | <i>FIE</i>                                                                 | Average first ionization energy                                                                                                                  |
|                     | <i>Nd</i>                                                                  | Average number of <i>d</i> orbital electron                                                                                                      |
|                     | <i>TF</i>                                                                  | Tetrahedral factor, average value of cation radius divided by anions radius                                                                      |
|                     | <i>V</i>                                                                   | Average DFT volume per atom of cations (T=0K ground state)                                                                                       |
|                     | <i>CR</i>                                                                  | Average covalent radius of each cations                                                                                                          |
|                     | <i>P</i>                                                                   | Average polarizabilities of cations                                                                                                              |
|                     | <i>EN</i>                                                                  | Average electronegativity difference between cations and nitrogen                                                                                |
|                     | <i>AR</i>                                                                  | Average atomic radius of each cations                                                                                                            |
|                     | <i>WF</i>                                                                  | Average work function of cations                                                                                                                 |
| Structural features | $N_{i/o}^{jth}(A-A)$ ,<br>$N_{i/o}^{jth}(B-B)$ ,<br>$N_{i/o}^{jth}(AB-AB)$ | The number of <i>j</i> th ( <i>j</i> th=1st, 2nd, 3rd, 4th) in-plane/out-of-plane <i>A-A</i> , <i>B-B</i> , <i>A-B</i> bonds                     |
|                     | $A_{xy}, A_z, B_{xy}, B_z$                                                 | Uniformity of the distribution of doped cations along <i>xy</i> and <i>z</i> direction ( <i>A</i> , <i>B</i> represent different cation element) |

Table S1 shows the original 11 features extracted from the properties of the elements or decomposition products of  $A_xB_yAl_{1-x-y}N$  and 19 features come from crystal structure. We describe the average as a weighted fraction of the elements or decomposition products, and define the materials features as following,

$$X = \sum_i f_i x_i \quad (1)$$

where  $f_i$  is the mole fraction and  $x_i$  correspond the property of an element or decomposition products. The decomposition products are obtained according to phase diagram. For instance, the decomposition products of  $\text{Al}_x\text{Sc}_{1-x}\text{N}$  are  $\text{AlN}$  with  $x$  and  $\text{ScN}$  with  $1-x$ . The *FED* (*BGD*) of  $\text{Al}_x\text{Sc}_{1-x}\text{N}$  is calculated by eq. (1), where  $x_i$  is the formation energy (band gap) of  $\text{AlN}$  and  $\text{ScN}$ , respectively,  $f_i$  is  $x$  for  $\text{AlN}$  and  $1-x$  for  $\text{ScN}$ .

The tetrahedral factor (*TF*) is define by

$$TF = \frac{R_{cation}}{R_N}, \quad (2)$$

where  $R_{cation}$  is the mole average of the Shannon's (1976) ionic radii of cations in  $\text{A}_x\text{B}_y\text{Al}_{1-x-y}\text{N}$  at four coordination and  $R_N$  is the radius of nitrogen at 4 coordination.

The electronegativity difference (*EN*) is mainly used to compare the difference between cations and anions, so we define it by

$$EN = 3.04 - EN_{cations}, \quad (3)$$

3.04 is the electronegativity of nitrogen and  $EN_{cations}$  is the electronegativity of cations, then using the equation (1) to make a further calculation.

We plot the Pearson correlation matrix to group features highly correlated with each other ( $|p| > 0.9$ ). Within each group, we choose a descriptor that is physically related to the target property and representative of other features in the group. For example, tetrahedral factor, volume, covalent radius, polarizability, electronegativity difference, atomic radius and work function are highly correlated. we select the tetrahedral factor (*TF*) as it reflects the size and change of polarization simultaneously.

Distinct cation bonds are distinguished by their relative positions. In the  $2 \times 2 \times 2$  supercell, five cation pairs are ordered according to the distance between two atoms. The type of different bond is plotted in Fig. S1. Fig. S1(a) show the *jth* (*jth*=1st, 2nd, 3rd, 4th) in-plane/out-of-plane bond with the same type elements (*A-A* or *B-B*), Fig. S1(b) show the *jth* (*jth*=1st, 2nd, 3rd, 4th) in-plane/out-of-plane bond with the different type elements (*AB*). The definition of  $A_{xy}$  ( $B_{xy}$ ) and  $A_z$  ( $B_z$ ) is as following,

$$\bar{a} = \left( \frac{a1}{n}, \frac{a2}{n}, \frac{a3}{n}, \frac{a4}{n} \right) / 4, \quad (4)$$

$$\bar{b} = \left( \frac{b1}{n}, \frac{b2}{n}, \frac{b3}{n}, \frac{b4}{n} \right) / 4, \quad (5)$$

$$\bar{c} = \left( \frac{c1}{n}, \frac{c2}{n}, \frac{c3}{n}, \frac{c4}{n} \right) / 4, \quad (6)$$

$$A_x = \frac{\sum_{i=1}^4 |ai - \bar{a}|}{4}, \quad (7)$$

$$A_y = \frac{\sum_{i=1}^4 |bi - \bar{b}|}{4}, \quad (8)$$

$$A_z = \frac{\sum_{i=1}^4 |ci - \bar{c}|}{4}, \quad (9)$$

$$A_{xy} = \frac{1}{2}(A_x + A_y), \quad (10)$$

where  $a1 \sim a4$ ,  $b1 \sim b4$ ,  $c1 \sim c4$  are the number of  $A(B)$  atoms per cation layer along  $a$ -,  $b$ - and  $c$ -directions, respectively,  $n$  is the total number of  $A(B)$  atoms in the  $2 \times 2 \times 2$  supercell.

### Structural features of the AlN-based supercell

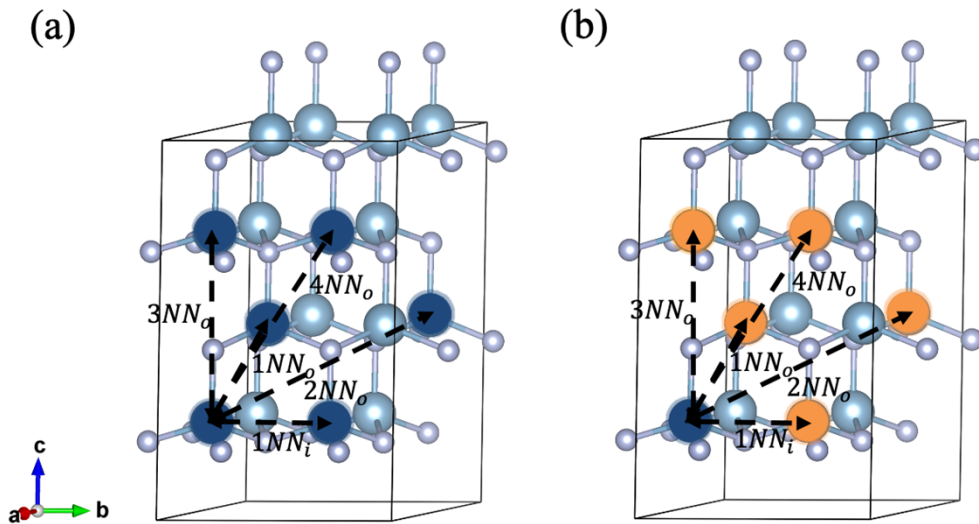

**Fig. S1 Structural features.** Schematic diagrams of the  $j$ th ( $j$ th=1st, 2nd, 3rd, 4th) in-plane/out-of-plane bond with the same type elements ( $A$ - $A$  or  $B$ - $B$ ), (b) with the different type elements ( $A$ - $B$ ).

## Pearson correlation matrix among 30 original features

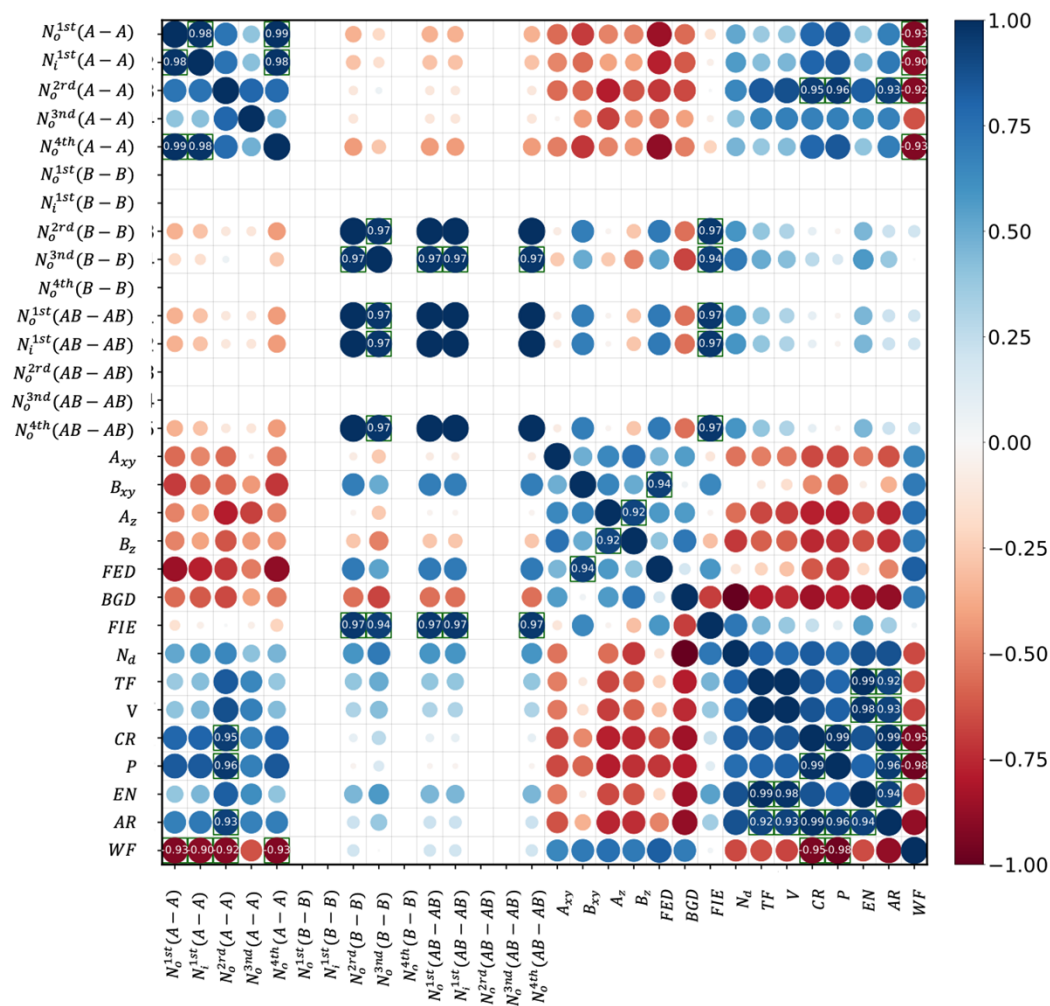

Fig. S2 Pearson correlation coefficient (PCC) correlation map of 30 features. The blue and red colors represent positive and negative correlations, respectively. Darker color and bigger circles indicate stronger correlation. Two features highly correlated with each other ( $|p| > 0.9$ ) are shown in green squares.

### Application of GBRT model in larger supercell

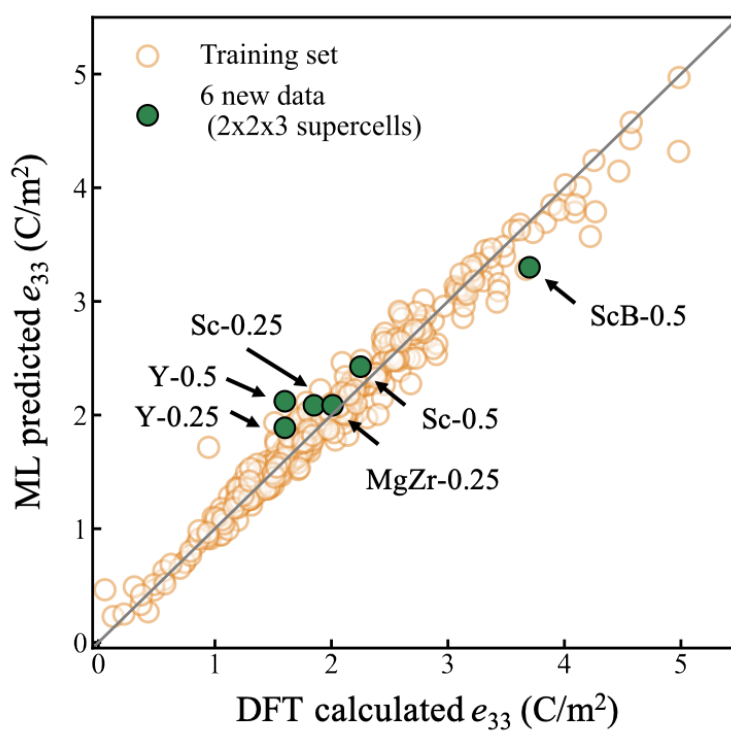

Fig. S3 Parity plots comparing DFT-computed  $e_{33}$  against ML-predicted  $e_{33}$  of 6 new structures with  $2 \times 2 \times 3$  supercell not included in the training dataset.
